# Supplementary material for: Comparative genomics analysis reveals genetic characteristics and nitrogen fixation profile of Bradyrhizobium
Source: PubMed Central journal article supplement — iScience. 2024 Jan 18;27(2):108948. doi: 10.1016/j.isci.2024.108948 (PMC10845061; doi:10.1016/j.isci.2024.108948), 2024-01-18
Supplement: mmc1.pdf [file mmc1.pdf]

iScience, Volume 27

## Supplemental information

**Comparative genomics analysis reveals genetic characteristics and nitrogen fixation profile of *Bradyrhizobium***

**Chaofang Zhong, Gang Hu, Cong Hu, Chaohao Xu, Zhonghua Zhang, and Kang Ning**

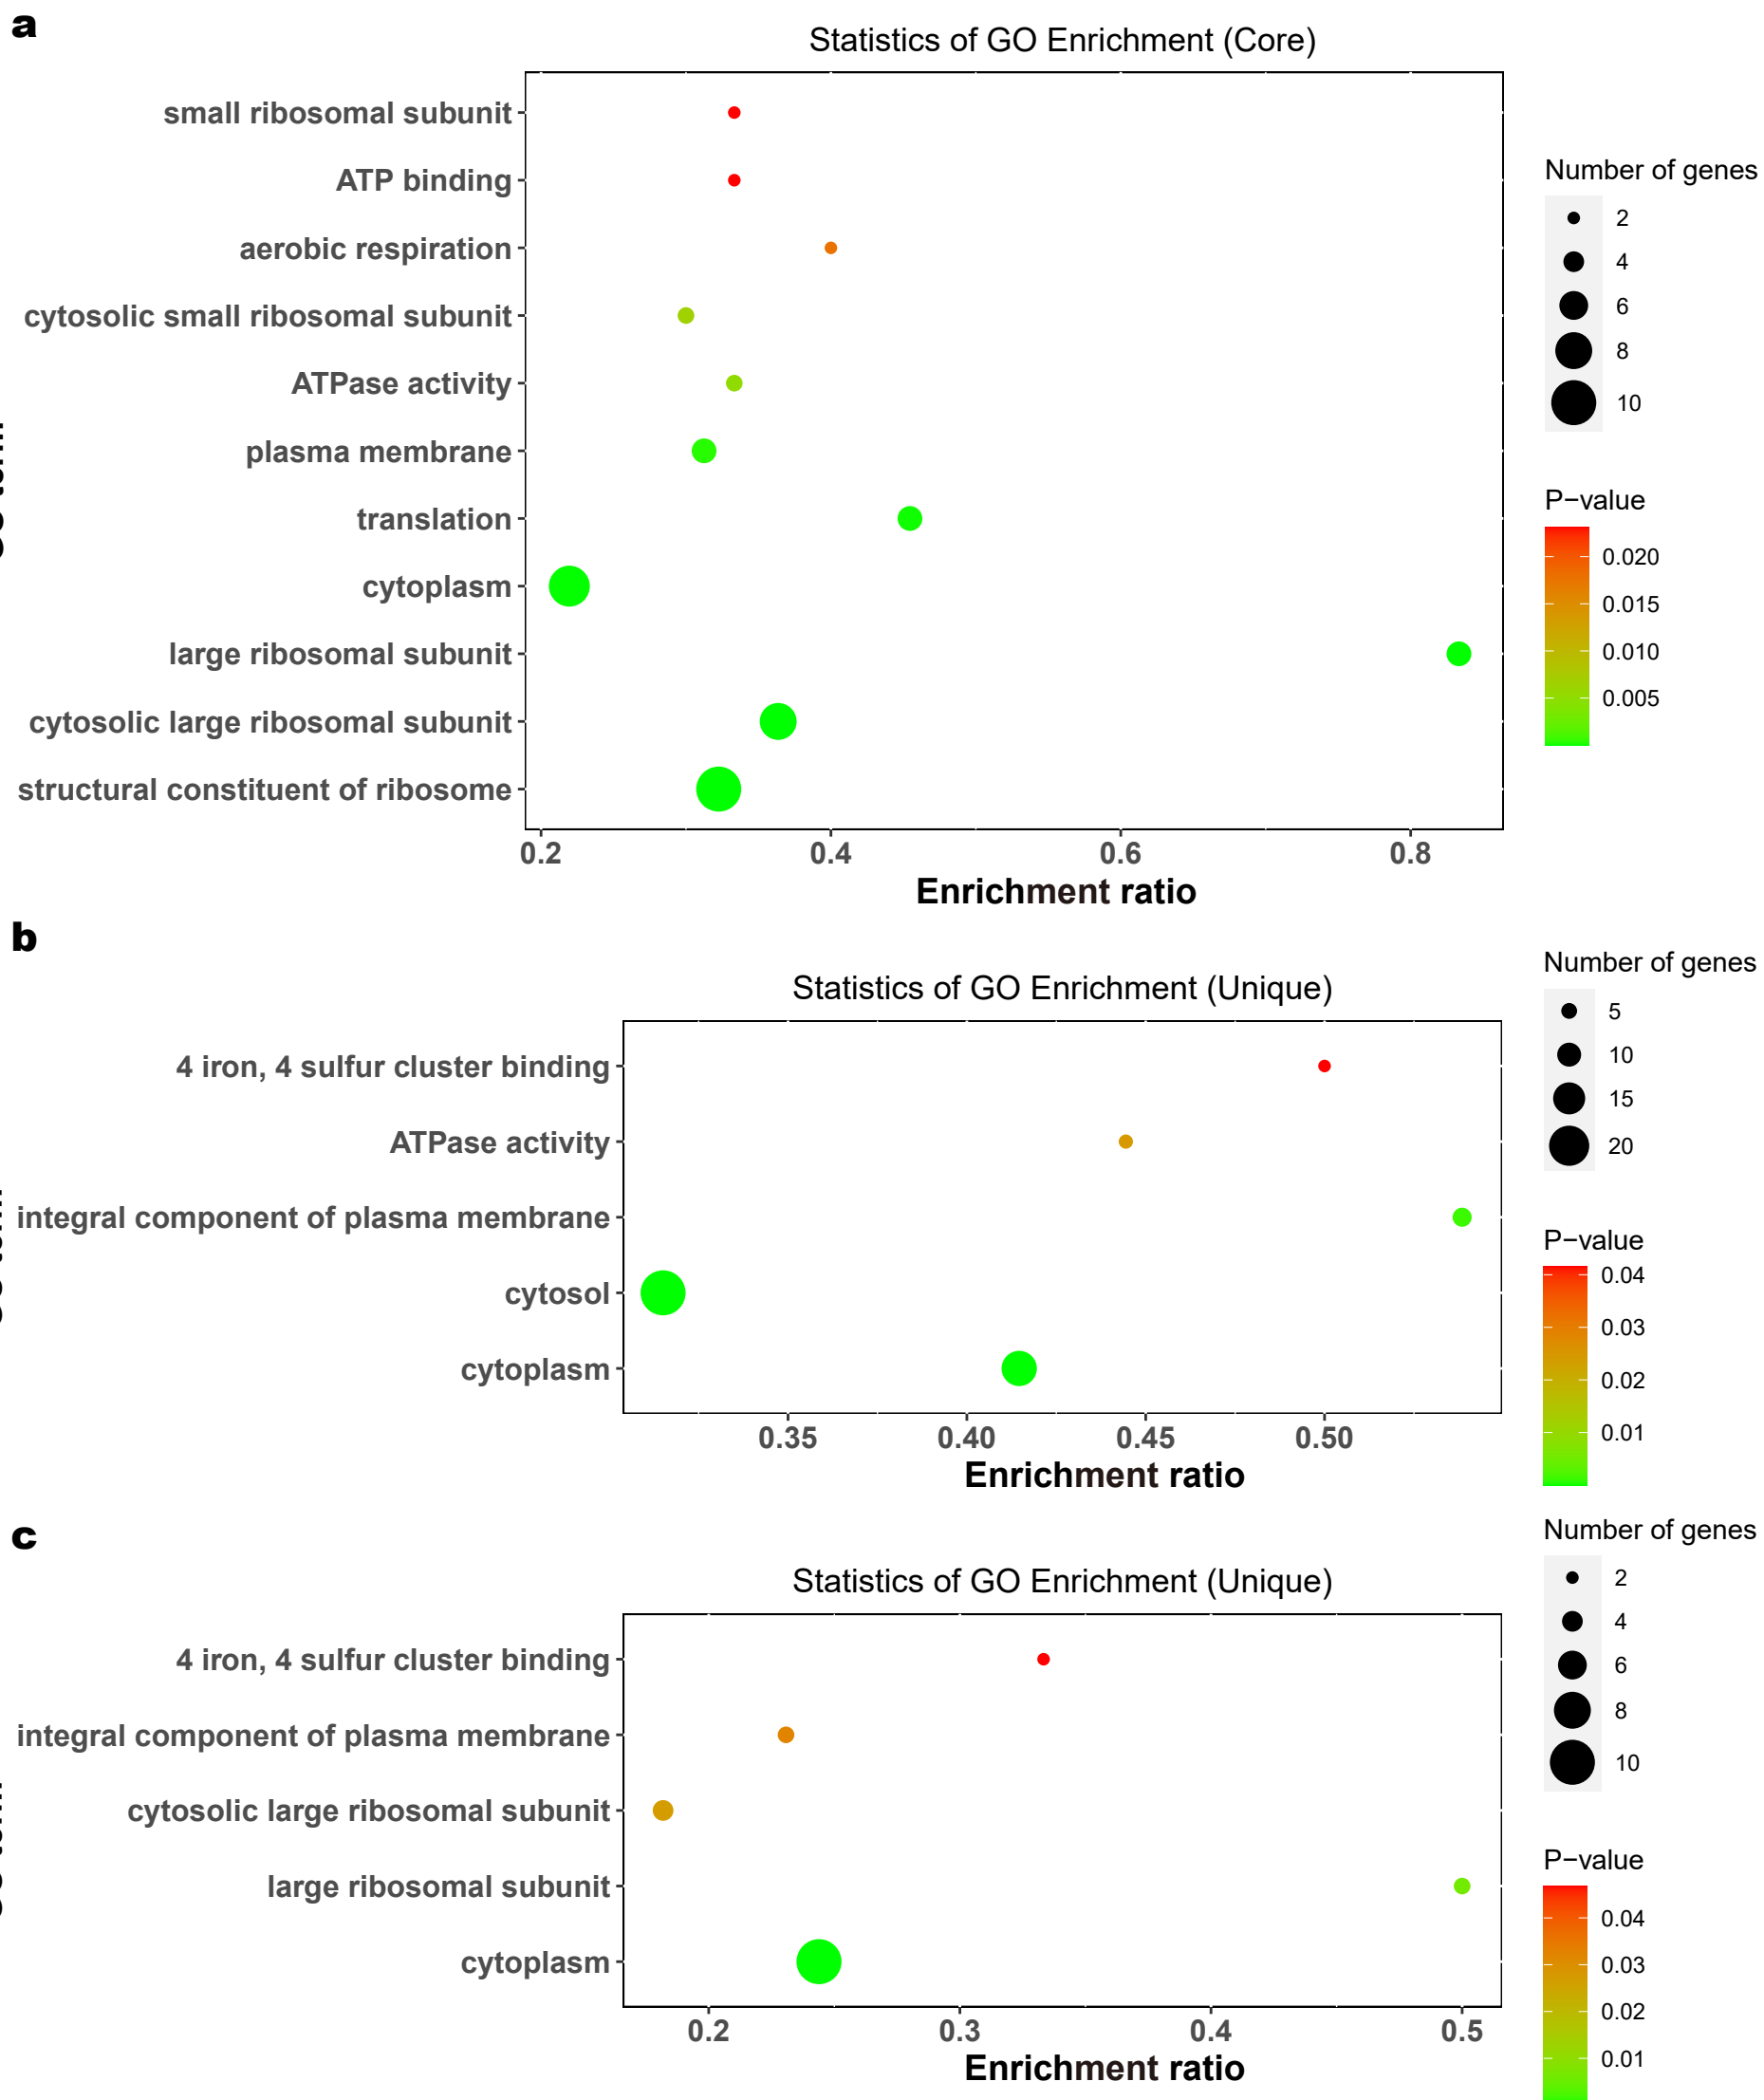

**Figure S1:** The GO enrichment analysis for core (a), accessory (b), and unique (c) genes, related to Figure 2. The size of bubbles represents the number of assigned genes, and the color of the bubbles indicates p-value. The larger the number of genes associated with the term, the larger the bubble.

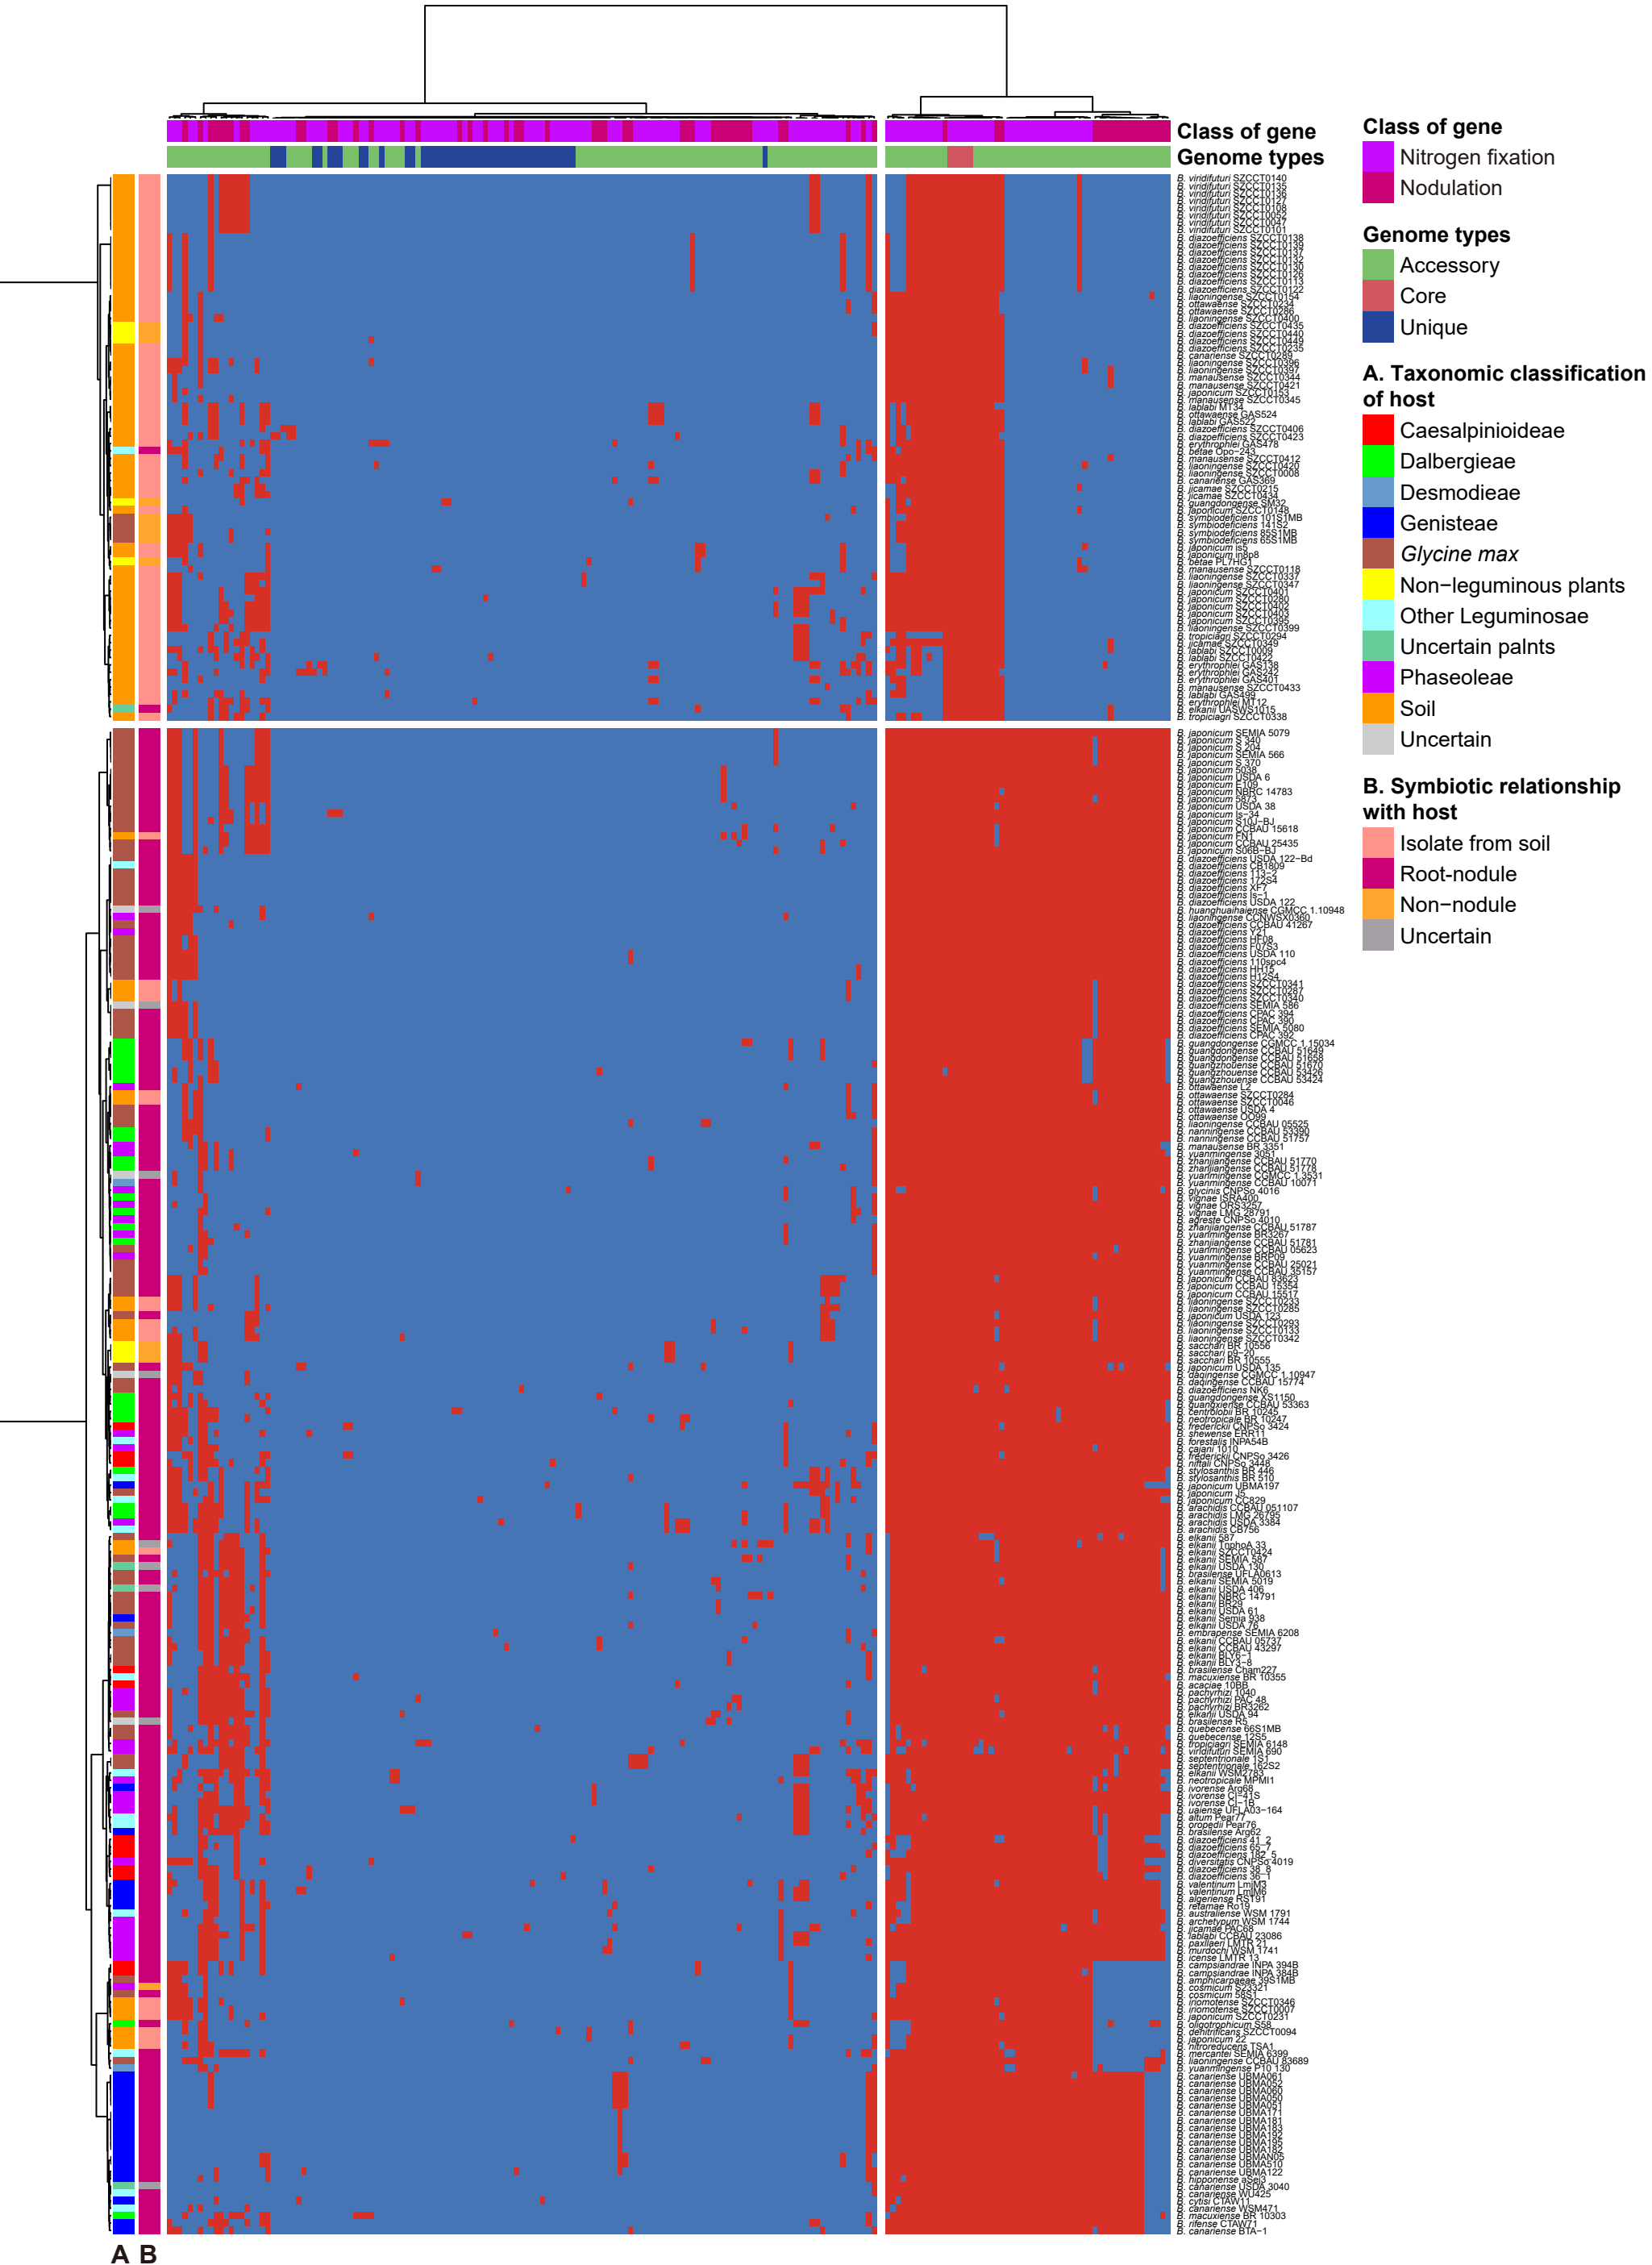

**Figure S2:** Presence (red)/absence (blue) pattern of genes involved in nodulation and nitrogen fixation in each Bradyrhizobium strain, related to Figure 4. A red box indicates presence of the gene in the corresponding strain while a blue box indicates an absence. The dendrogram was generated based on the ward.D method for clustering of euclidean distances.

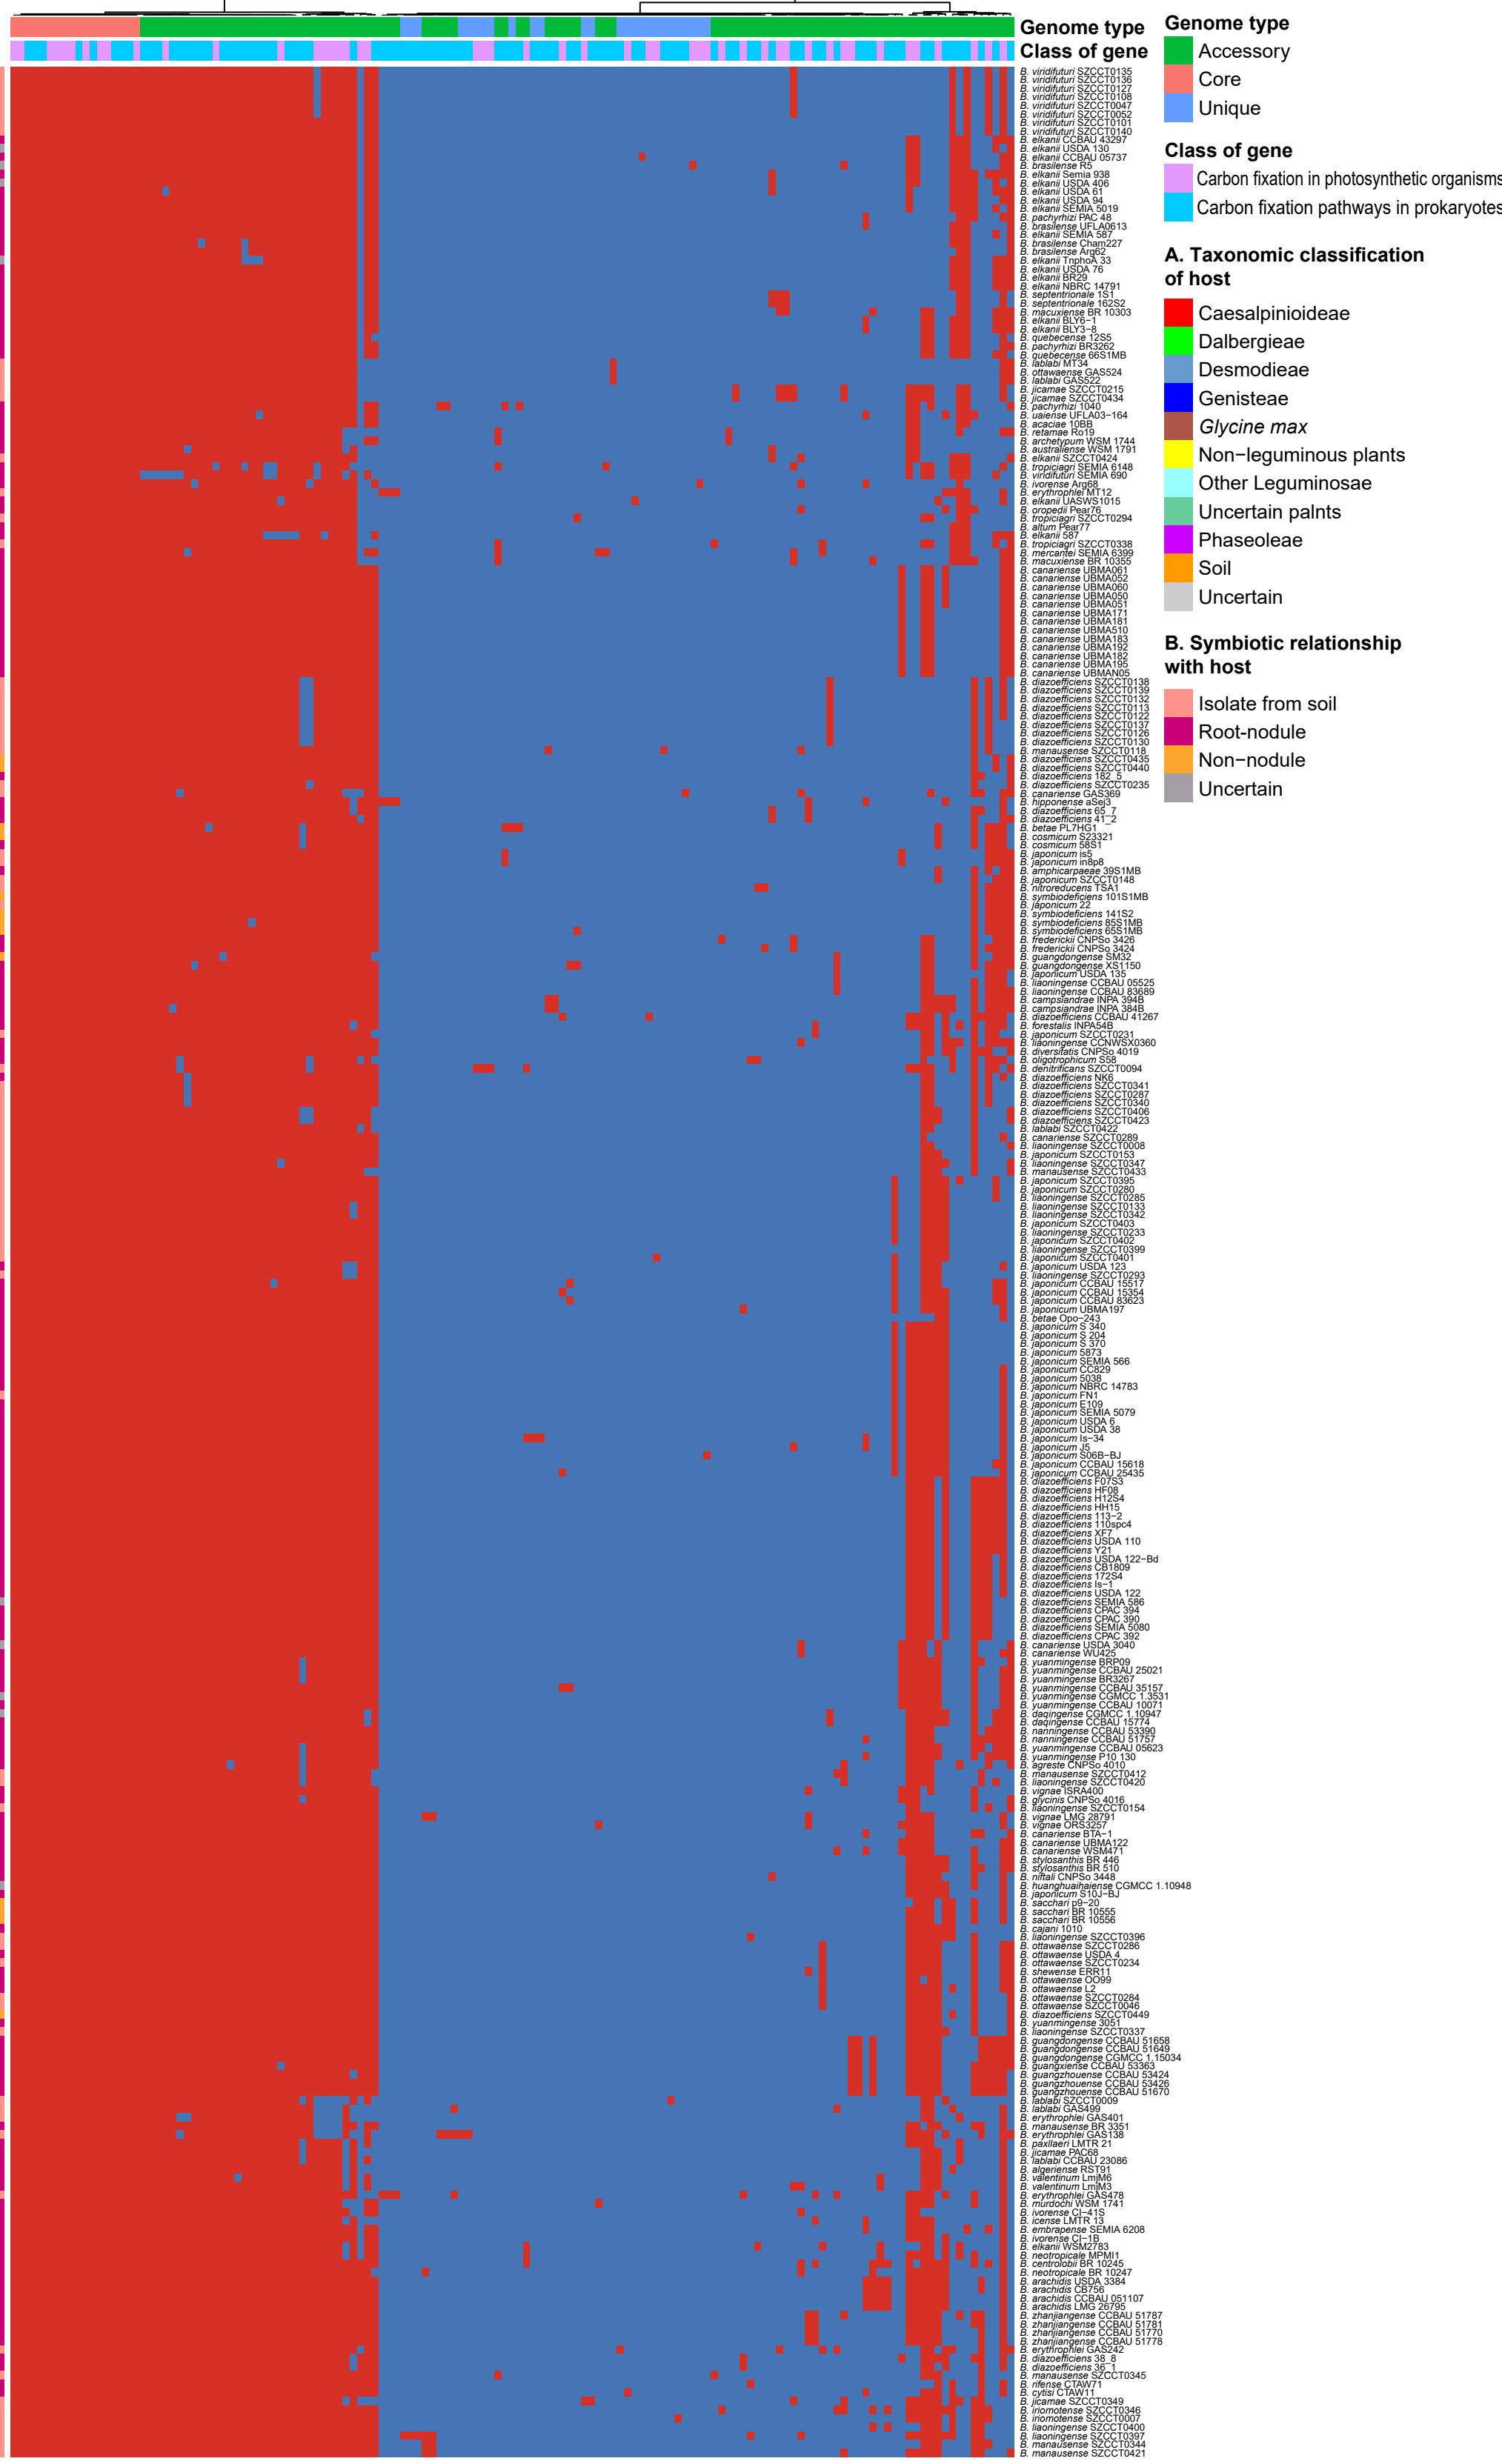

**Figure S3:** Presence (red)/absence (blue) pattern of genes involved in carbon fixation in each *Bradyrhizobium* strain, related to Figure 3. A red box indicates presence of the gene in the corresponding strain while a blue box indicates an absence. The dendrogram was generated based on the ward.D method for clustering of euclidean distances.

MASH clustering

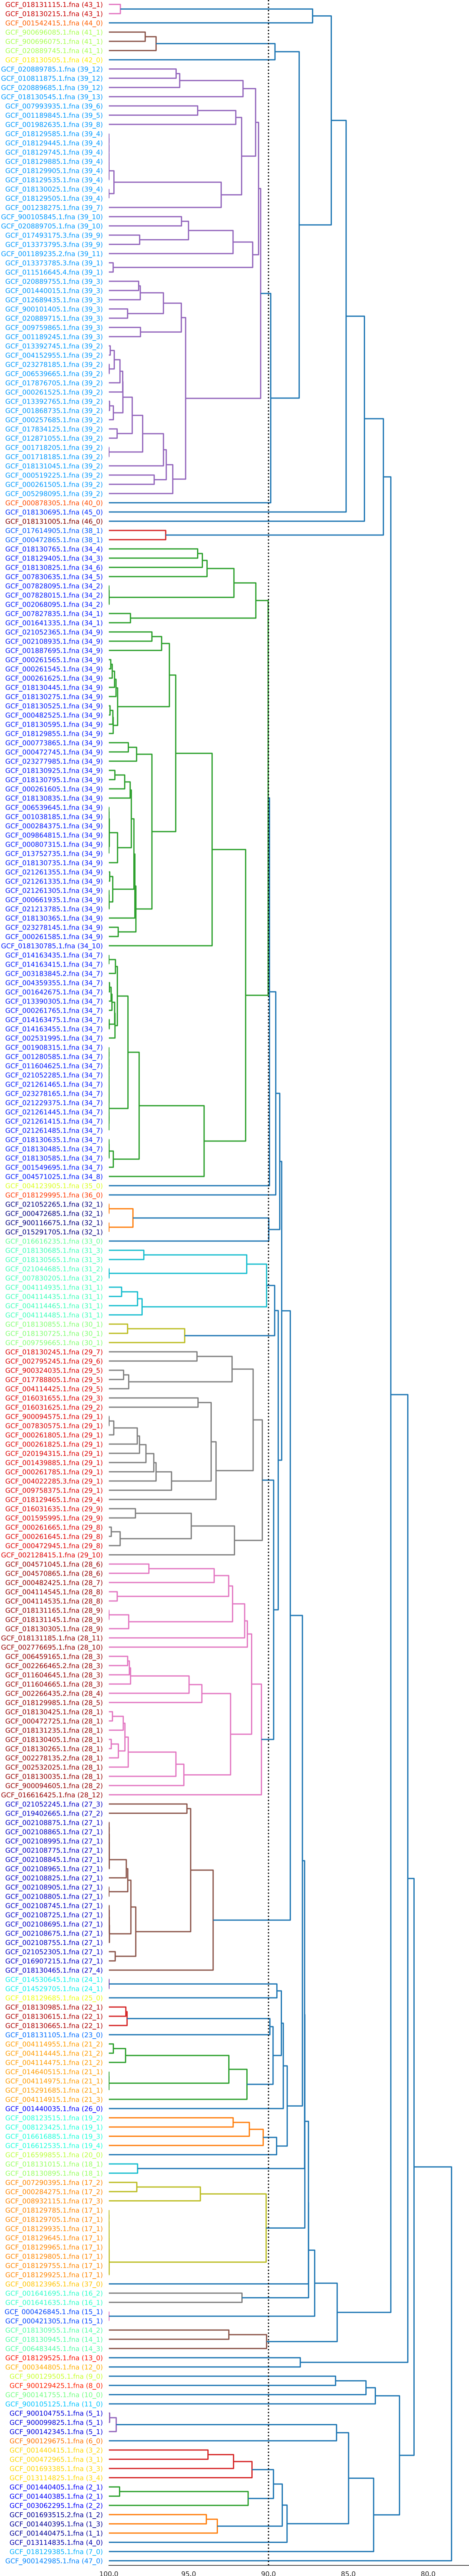

Figure S4: Pairwise mash distances between 278 genomes, related to STAR METHODS.

**Table S4: 139 genes potentially involved in carbon fixation, related to Figure 3.**

| ID             | Genome set | KO     | Gene name | Class                    |
|----------------|------------|--------|-----------|--------------------------|
| WP_038384397.1 | Unique     | K00626 | ACAT      | prokaryotes              |
| WP_038967712.1 | Unique     | K01610 | pckA      | photosynthetic organisms |
| WP_041961059.1 | Unique     | K01902 | sucD      | prokaryotes              |
| WP_041961099.1 | Unique     | K00626 | ACAT      | prokaryotes              |
| WP_043854822.1 | Unique     | K02160 | accB      | prokaryotes              |
| WP_148750643.1 | Unique     | K00134 | GAPDH     | photosynthetic organisms |
| WP_201280180.1 | Unique     | K00242 | sdhD      | prokaryotes              |
| WP_212226591.1 | Unique     | K00626 | ACAT      | prokaryotes              |
| WP_211407045.1 | Unique     | K00246 | frdC      | prokaryotes              |
| WP_012040783.1 | Unique     | K03841 | FBP       | photosynthetic organisms |
| WP_012040787.1 | Unique     | K00927 | pgk       | photosynthetic organisms |
| WP_012042813.1 | Unique     | K01602 | rbcS      | photosynthetic organisms |
| WP_212234116.1 | Unique     | K01849 | mcmA2     | prokaryotes              |
| WP_212354841.1 | Unique     | K00615 | tktA      | photosynthetic organisms |
| WP_249158379.1 | Unique     | K00241 | sdhC      | prokaryotes              |
| WP_249155512.1 | Unique     | K00855 | PRK       | photosynthetic organisms |
| WP_212435597.1 | Unique     | K00246 | frdC      | prokaryotes              |
| WP_212435598.1 | Unique     | K00240 | sdhB      | prokaryotes              |
| WP_246563647.1 | Unique     | K00247 | frdD      | prokaryotes              |
| WP_229177710.1 | Unique     | K00615 | tktA      | photosynthetic organisms |
| WP_248890080.1 | Unique     | K00150 | gap2      | photosynthetic organisms |
| WP_176937106.1 | Unique     | K01624 | FBA       | photosynthetic organisms |
| WP_244549119.1 | Unique     | K03737 | por       | prokaryotes              |
| WP_079604826.1 | Unique     | K01902 | sucD      | prokaryotes              |
| WP_172842551.1 | Unique     | K00925 | ackA      | prokaryotes              |
| WP_079572650.1 | Unique     | K00626 | ACAT      | prokaryotes              |
| cluster1042    | Core       | K02160 | accB      | prokaryotes              |
| cluster1079    | Core       | K01803 | TPI       | photosynthetic organisms |
| cluster11314   | Accessory  | K00925 | ackA      | prokaryotes              |
| cluster1160    | Core       | K01676 | fumA      | prokaryotes              |
| cluster1199    | Core       | K01679 | fumC      | prokaryotes              |
| cluster12123   | Accessory  | K00240 | sdhB      | prokaryotes              |
| cluster14008   | Accessory  | K01491 | folD      | prokaryotes              |
| cluster141     | Accessory  | K00626 | ACAT      | prokaryotes              |
| cluster1421    | Accessory  | K01006 | ppdK      | photosynthetic organisms |
| cluster1443    | Accessory  | K09709 | meh       | prokaryotes              |
| cluster14615   | Accessory  | K09709 | meh       | prokaryotes              |
| cluster1499    | Accessory  | K00241 | sdhC      | prokaryotes              |
| cluster15424   | Accessory  | K01958 | PC        | prokaryotes              |
| cluster1632    | Accessory  | K01595 | ppc       | photosynthetic organisms |
| cluster16926   | Accessory  | K01491 | folD      | prokaryotes              |
| cluster17045   | Accessory  | K00626 | ACAT      | prokaryotes              |
| cluster1717    | Accessory  | K05606 | MCEE      | prokaryotes              |
| cluster17443   | Accessory  | K01491 | folD      | prokaryotes              |
| cluster1770    | Accessory  | K00031 | IDH1      | prokaryotes              |
| cluster17737   | Accessory  | K00615 | tktA      | photosynthetic organisms |
| cluster1808    | Accessory  | K15022 | fdhB      | prokaryotes              |
| cluster1809    | Accessory  | K00175 | korB      | prokaryotes              |
| cluster184     | Core       | K00029 | maeB      | photosynthetic organisms |
| cluster18443   | Accessory  | K00626 | ACAT      | prokaryotes              |
| cluster1892    | Accessory  | K00297 | metF      | prokaryotes              |
| cluster1907    | Accessory  | K00174 | korA      | prokaryotes              |
| cluster19084   | Accessory  | K00615 | tktA      | photosynthetic organisms |
| cluster19098   | Accessory  | K00615 | tktA      | photosynthetic organisms |
| cluster19635   | Accessory  | K00615 | tktA      | photosynthetic organisms |

|              |           |        |         |                          |
|--------------|-----------|--------|---------|--------------------------|
| cluster19915 | Accessory | K01895 | ACSS1_2 | prokaryotes              |
| cluster20    | Core      | K00615 | tktA    | photosynthetic organisms |
| cluster2023  | Accessory | K01902 | sucD    | prokaryotes              |
| cluster2032  | Accessory | K01962 | accA    | prokaryotes              |
| cluster209   | Core      | K00626 | ACAT    | prokaryotes              |
| cluster21717 | Accessory | K01783 | rpe     | photosynthetic organisms |
| cluster21950 | Accessory | K01902 | sucD    | prokaryotes              |
| cluster2210  | Accessory | K01783 | rpe     | photosynthetic organisms |
| cluster22224 | Accessory | K14470 | mct     | prokaryotes              |
| cluster22581 | Accessory | K02160 | accB    | prokaryotes              |
| cluster2380  | Accessory | K00029 | maeB    | photosynthetic organisms |
| cluster23846 | Accessory | K01006 | ppdK    | photosynthetic organisms |
| cluster2398  | Accessory | K01491 | folD    | prokaryotes              |
| cluster244   | Accessory | K01895 | ACSS1_2 | prokaryotes              |
| cluster25    | Core      | K01624 | FBA     | photosynthetic organisms |
| cluster250   | Accessory | K01847 | MUT     | prokaryotes              |
| cluster25185 | Accessory | K01624 | FBA     | photosynthetic organisms |
| cluster25666 | Accessory | K00024 | mdh     | photosynthetic organisms |
| cluster25743 | Accessory | K00626 | ACAT    | prokaryotes              |
| cluster2626  | Accessory | K00626 | ACAT    | prokaryotes              |
| cluster2628  | Accessory | K01601 | rbcL    | photosynthetic organisms |
| cluster26334 | Accessory | K00029 | maeB    | photosynthetic organisms |
| cluster26673 | Accessory | K00615 | tktA    | photosynthetic organisms |
| cluster26751 | Accessory | K01676 | fumA    | prokaryotes              |
| cluster2680  | Accessory | K01961 | accC    | prokaryotes              |
| cluster27142 | Accessory | K00626 | ACAT    | prokaryotes              |
| cluster27274 | Accessory | K00240 | sdhB    | prokaryotes              |
| cluster28651 | Accessory | K00626 | ACAT    | prokaryotes              |
| cluster2971  | Accessory | K01621 | xfp     | photosynthetic organisms |
| cluster2981  | Accessory | K03841 | FBP     | photosynthetic organisms |
| cluster30134 | Accessory | K00626 | ACAT    | prokaryotes              |
| cluster3020  | Accessory | K00626 | ACAT    | prokaryotes              |
| cluster30269 | Accessory | K01679 | fumC    | prokaryotes              |
| cluster32180 | Accessory | K15020 | PSES    | prokaryotes              |
| cluster3262  | Accessory | K00626 | ACAT    | prokaryotes              |
| cluster32890 | Accessory | K00240 | sdhB    | prokaryotes              |
| cluster32891 | Accessory | K00242 | sdhD    | prokaryotes              |
| cluster32892 | Accessory | K00241 | sdhC    | prokaryotes              |
| cluster33109 | Accessory | K01849 | mcmA2   | prokaryotes              |
| cluster3347  | Accessory | K00626 | ACAT    | prokaryotes              |
| cluster33752 | Accessory | K14449 | mch     | prokaryotes              |
| cluster34009 | Accessory | K01902 | sucD    | prokaryotes              |
| cluster346   | Accessory | K00626 | ACAT    | prokaryotes              |
| cluster350   | Core      | K00239 | sdhA    | prokaryotes              |
| cluster37050 | Accessory | K00626 | ACAT    | prokaryotes              |
| cluster3720  | Accessory | K00925 | ackA    | prokaryotes              |
| cluster37692 | Accessory | K00240 | sdhB    | prokaryotes              |
| cluster39009 | Accessory | K01595 | ppc     | photosynthetic organisms |
| cluster39103 | Accessory | K14534 | abfD    | prokaryotes              |
| cluster39704 | Accessory | K00615 | tktA    | photosynthetic organisms |
| cluster40303 | Accessory | K00241 | sdhC    | prokaryotes              |
| cluster40360 | Accessory | K00174 | korA    | prokaryotes              |
| cluster40374 | Accessory | K00175 | korB    | prokaryotes              |
| cluster41182 | Accessory | K00626 | ACAT    | prokaryotes              |
| cluster412   | Core      | K00134 | GAPDH   | photosynthetic organisms |
| cluster42505 | Accessory | K00626 | ACAT    | prokaryotes              |
| cluster426   | Accessory | K00626 | ACAT    | prokaryotes              |
| cluster4435  | Accessory | K00925 | ackA    | prokaryotes              |

|             |           |        |           |                          |
|-------------|-----------|--------|-----------|--------------------------|
| cluster4554 | Accessory | K00625 | pta       | prokaryotes              |
| cluster4800 | Accessory | K01610 | pckA      | photosynthetic organisms |
| cluster4870 | Accessory | K01783 | rpe       | photosynthetic organisms |
| cluster556  | Accessory | K01602 | rbcS      | photosynthetic organisms |
| cluster5684 | Accessory | K00615 | tktA      | photosynthetic organisms |
| cluster572  | Core      | K11532 | glpX-SEBP | photosynthetic organisms |
| cluster5736 | Accessory | K00615 | tktA      | photosynthetic organisms |
| cluster576  | Accessory | K00855 | PRK       | photosynthetic organisms |
| cluster584  | Accessory | K01903 | sucC      | prokaryotes              |
| cluster5932 | Accessory | K00615 | tktA      | photosynthetic organisms |
| cluster661  | Core      | K00024 | mdh       | photosynthetic organisms |
| cluster6709 | Accessory | K08691 | mcl       | prokaryotes              |
| cluster6787 | Accessory | K01808 | rpiB      | photosynthetic organisms |
| cluster687  | Core      | K01807 | rpiA      | photosynthetic organisms |
| cluster6916 | Accessory | K01679 | fumC      | prokaryotes              |
| cluster7597 | Accessory | K01006 | ppdK      | photosynthetic organisms |
| cluster7795 | Accessory | K01007 | pps       | prokaryotes              |
| cluster841  | Core      | K00242 | sdhD      | prokaryotes              |
| cluster842  | Core      | K00240 | sdhB      | prokaryotes              |
| cluster8585 | Accessory | K14534 | abfD      | prokaryotes              |
| cluster886  | Core      | K01963 | accD      | prokaryotes              |
| cluster8897 | Accessory | K02160 | accB      | prokaryotes              |
| cluster8965 | Accessory | K01961 | accC      | prokaryotes              |
| cluster966  | Core      | K01623 | ALDO      | photosynthetic organisms |
| cluster967  | Core      | K00927 | pgk       | photosynthetic organisms |
| cluster9679 | Accessory | K01491 | folD      | prokaryotes              |

---
